# Supplementary material for: Do physical activity interventions combining self-monitoring with other components provide an additional benefit compared with self-monitoring alone? A systematic review and meta-analysis
Source: HighWire-hosted journal article supplement (doi:10.1136/bjsports-2021-105198), 2022-09-07
Supplement: bjsports-2021-105198supp003_data_supplement.xlsx [file bjsports-2021-105198supp003_data_supplement.xlsx]

## Sheet: Studies
	No of Arms	Country	Setting	Population characterisics	Total at baseline	Total analysed	Females	Males	Age	BMI	Length of the intervention	Follow up since randomization	Description of active control condition	Device used for self-monitoring and manufacturer	What was self-monitored	Device used to measure physical activity	Units of measurement	Results at the end of the intervention	Results at follow-up	Description of intervention component(s) above the active control condition
A 2018	2	Malaysia	primary care clinic	Adults (35 to 45 y), no chronic illness	80	62	46	16	57.7	27.05	12 wk	NA	physical activity counselling, pedometer, goal of 10,000 steps/d, diary (3 days per week documentation)	not specified	daily step-count - 3 days per week	pedometer, not specified	steps/day	9159.97 (SD 2081.51) vs. 7540.97 (SD 1703.11) steps, p=0.001	NA	monthly meeting with respective group members (groups of 10-15 people) and researcher for support, motivation and walking activities
Alencar 2019	2	USA	flyers, word of mouth, and email list-serve of individuals previously consenting to receive email marketing from inHealth Medical Services	Adults (23 to 64 y), participants on stable blood pressure medications who were otherwise determined healthy, did not have metabolic or renal disease, and were not using medications known to alter metabolism	30	25	13	12	46.576	34.7	12 wk	NA	3 devices delivered (accelerometer- watch, blood pressure monitor, body composition scale), electronic reporting, video conference initially with calorie recommendations and physical activity guidelines from physicain and dietitian	Withings_x0002_ Activite Pop (Cambridge, MA, USA)	weekly step-count	Withings_x0002_ Activite Pop (Cambridge, MA, USA) accelerometer	weekly step change vs. baseline	30163.8_x0002_(SD 30 117.6) steps vs. -5972.0 (SD 22 286 steps, p<0.05	NA	educational online curriculum delivered 1x/wk through video module and educational handout, individualized video-call feedback from the dietitian
Andrade 2014	2	USA	advertisements stating	Sedentary adults (18 y or older), no psychiatric illness, back or leg problem, recent heart attack or pathological gambling	61	61	55	6	48	NA	12 wk	20 wk	pedometer, goal of 10,000 steps/d, meeting, gift cards	Omron model HJ-112 (Kyoto, Japa) pedometer	daily step-count	Omron model HJ-112 (Kyoto, Japa) pedometer	steps/day change vs. baseline	-788 vs. -2143 steps, p=0.004	-3851 vs. -3817, p=0.88	bonus draws of small prizes if a goal of 10000 steps/d was reached on prior 4 days, mean 7 meetings during intervention
Arovah 2018	2	Indonesia	public hospital	older adults (59 to 72 y), participants were type 2 diabetes mellitus patients	43	43	27	16	65.5093	25.0395	12 wk	24 wk	pedometer, log sheet for recording steps	Yamax SW200 pedometer	daily step-count	Yamax SW200 pedometer	steps/day change vs. baseline	3220 vs. 1402 steps, p=0.025	3338 vs. 1273, p<0.001	educational materials, text messaging (1-3 times/day), neccesity to complete a workbook on a weekly basis, sending weekly steps to the researchers
Bickmore 2013	2	USA	urban ambulatory care practices	older adults(65 - 77 y), inactive, free of any medical condition that would limit participation, stable on all medications	263	200	161	102	71.3	29.5	2 mo	12 mo	pedometer, diary	Omron HJ-720ITC (Omron Healthcare, Inc., Bannockburn, IL, USA) pedometer	daily step-count	Omron HJ-720ITC (Omron Healthcare, Inc., Bannockburn, IL, USA) pedometer	steps/day	4335 (2498) vs. 4303 (2747), p=ns	4365 (2957) vs. 4033 (2573), p	daily 5 min videos from tablet simulating face-to-face contact (check-in to determine the course of intervention, provide empathic opportunities and reinforcement, review and set the goals, identify barriers, engage in problem-solving discussion, give a tip of the day)
Budworth 2019	5	UK	poster/email advertisements and screened via an online eligibility questionnaire	adults (18 to 65 y old) classified as having low/moderate levels of physical activity, healthy	80	80	58	22	35.3	NA	2 wk	NA	Pedometer, Completers earned £25; participants were given a goal but were offered no financial incentive to achieve it, receiving only the standard participation vouchers. Goal: participants walking ≤8000 median daily steps were given a goal of 10,000 daily steps, participants walking>8000 steps were given a goal of 12,000.	Yamax/Yamasa PZ-271 pedometer	daily step-count	Yamax/Yamasa PZ-271 pedometer	steps/day	FI 9690 (3769), MCC 9504 (4186), MCC+FI 11755 (2984), CG 9386 (2967), CWOG 8680 (3268)	NA	(FI) Participants earned additonal £15 in vouchers to £25 for completion if they met their set goal on 12 of the 14 days; (MCC) participants had the option of putting £0, £5, £10 or all of their time 2 £15 voucher aside. Failing to meet their goal on 12 out of 14 days forfeited whatever they put aside (though still received the standard time 3 £10 voucher); (MCC + FI) - both conditions
Cadmus-Bertram 2015	2	USA	NA	overweight, postmenopausal women	51	51	51	0	51	29.2	16 wk	NA	basic pedometer, printed materials with tips for increasing steps, brief goal-setting process	Fitbit One (intervention group), basic pedometer (control group)	daily step-count	ActiGraph GT3X+ (ActiGraph, Pensacola, FL) accelometer	steps/day change vs. baseline	789 (1979) vs. 362 (1605), p=0.3	NA	web-based tracking helping to identify self-monitoring, combined with other self-regulatory skills (e.g., goal-setting, frequent behavioral feedback), individualized step-goals for the first 4 weeks, a follow-up call at 4 weeks to evaluate progress and refine goals
Cherubini 2020	4	Switzerland	students from the University of Lausanne	adults (18 years of age or older)	220	161	92	69	21.7361	NA	18 wk	29 wk	Participants in the control group did not receive any other notifications, aside from the daily morning message announcing the goal for the day	iPhone with an app and internal accelerometer	daily step-count	iPhone with an app and internal accelerometer	steps/day change vs. baseline	FIX -208 vs. MESSEGES -642 vs. CON +10	FIX -599 vs. MESSEGES -906 vs. CON -687	(FIX) Participants in this group were assigned 0.60 CHF or Swiss franc (equivalent to 0.60 USD) every day they reached their daily goal; (LOT) Participants in this group were assigned a weekly lottery ticket every time they reached their goal of daily steps; (MESSAGES) every morning participants in this group received a motivational message pulled sequentially from a pre-arranged corpus
Chiang 2019	3	Thaiwan	college	young adults with obesity, not regularly engage in physical activity	23	23	NA	NA	19.873	30.0917	8 wk	NA	smartwatch, goal of 12,000 step/d Monday to Friday, exercise log	ZenWatch 3 (ASUS TeK Computer Inc., Taipei, Taiwan) smartwatch	daily step-count	ZenWatch 3 (ASUS TeK Computer Inc., Taipei, Taiwan) smartwatch	steps/day	12288 (721) vs. 11340.46 (743), p<0.05	NA	30-min of continuous moderate-intensity (103 steps/min) walking exercises on 3 days per week monitored by professional instructors in order to maintain a steady brisk walking pace
Choi 2016	2	USA	prenatal clinics and communities	Adult women, pregnant	30	29	29	0	33.7	27.7	12 wk	NA	Fitbit Ultra, initial in-person session on IOM recommendations for gestational weight gain and safety instruction for promoting PA during pregnancy. Women were asked to increase their steps gradually until they reach at least 8500 steps/day 5 days or more per week.	Fitbit Ultra accelerometer	daily step-count	Fitbit Ultra accelerometer	steps/day change vs. baseline	1096.2 (1898.1) vs. 258.7 (1603.7), p=0.13	NA	30 min in-person session on short and long-term goal setting, problem-solving skills, techniques for developing and maintaining social support for PA, and a plan for lapses in the process of increasing PA, information on a healthy diet, access to a mobile phone app, daily messages, activity diary
Choi 2019	2	USA	university campuses, hospitals, community libraries and preschools	Adult women with young children	49	47	47	0	36.4	31.4	12 wk	NA	Fitbit Zip, initial visit with education on benefits of PA, knowledge and skills to increase PA , personal goals (aksed to increase their steps by 20% each week until they reached at least 10,000 steps/day for 5 days or more per week), information on healthy diet, monthly e-mail remiander on step goals	Fitbit Zip accelerometer	daily step-count	Fitbit Zip accelerometer	steps/day change vs. baseline	914 (421) vs. 693 (421), p=0.71	NA	Exercising with buddies at least once a week, checking each other’s step counts and encouraging each other to increase steps by exchanging text messages or emoticons using the Fitbit app.
Chokshi 2018	2	USA	4 hospitals in southeastern Pennsylvania	Ischemic heart disease patients (18+ y old) acute coronary syndrome or coronary catheterization for suspected ischemic heart disease	105	105	32	73	59.5286	30.5286	16 wk	24 wk	pedometer, goal of 10,000 steps per day, no other interventions	Misfit Shine pedometer	daily step-count	Misfit Shine pedometer	steps/day change vs. baseline	difference between groups 1216 (350, 2082), p<0.01	difference between groups 1063 (128, 1997), p=0.03	patients were offered a loss-framed financial incentive for 16 wk of the intervention, each week $14 was allocated to the account with $2 deducted if the daily goal was not met
Chudowolska-Kielkowska 2020	2	Poland	one ambulatory, primary care clinic	sedentary older adults (50 to 75 y) with at least one cardiovascular risk factor (obesity, hypertension, heart failure, etc.)	199	164	109	55	62.4756	29.5244	3 mo	NA	individual 10 min nurse-led tutorial with distributed hand-outs on the health benefits of regular physical activity; simple pedometer; told to note the number of steps per day	M2 Smartband (Enwei Technology Co. Ltd., Shenzhen, China) pedometer	daily step-count	M2 Smartband (Enwei Technology Co. Ltd., Shenzhen, China) pedometer	steps/day	10648_x0001_(3098) vs. 3589_x0001_(2000), p<0.0001	NA	a goal of minimum 7000 steps per day; phone calls to assess the goal attainment and support its achievement every 2 weeks
Creel 2016	3	USA	hospital	adults before and after bariatric surgery	100	70	58	12	44.9	46.85	6 mo	NA	pedometer, 1 page pedometer handout promoting achievement of 10,000 step/d, step journal	Omron HJ-113 pedometer	daily step-count	GT3X accelerometer	steps/day	6787 vs. 5325, p<0.05	NA	individual counselling be surgeon and a certified exercise professional delivered on each monthly visit, printed materials in a manual (other than handout for the C group), individual goal setting
Croteau 2014	2	USA	internal medicine practice	inactive adults over the age of 50 y old	39	28	21	7	64	32.2	6 mo	12 mo	6 month PA program consisting of participant manual, counseling (goal-setting, activity selection, strategies for overcoming barriers), pedometer usage, and self-monitoring, step goal - 10-15% over baseline	Accusplit AE120XL (an imported version of SW-200 Yamax Digi-Walker) pedometer	daily step-count	Accusplit AE120XL (an imported version of SW-200 Yamax Digi-Walker) pedometer	step/day change vs. baseline	2200 vs. 787, p<0.01	1652 vs. 612, p<0.05	group meetings each month with a fitness professional for the first 6 months including (turning in the calendars, receiving new calendars, determining new goals and sharing strategies used to increase PA)
Damschroder 2020	2	USA	administrative medical record data for US veterans	adults (younger than 65 y old)	375	226	90	267	39.8	NA	12 mo	NA	objective PA monitoring (Fitbit), weight self-monitoring weekly (provided scale), app for data visualizations, administrative only message reminders as needed	Fitbit Charge 2 accelerometer	daily step-count	Fitbit Charge 2 accelerometer	steps per week	5736 (4635-6837) vs. 5638 (4612-6663), p=0.08	NA	personalized coaching (automated in-app motivational messages - 3/week for the duration of the 12-month program, telephone-based human health coaching - up to 3 calls, spaced over the first 9 weeks and personalized weekly goal setting (increase by 5 min a day a week up to 60 min)
De Cocker 2012	2	Belgium	general practitioners	adults	92	69	54	38	47.162	26.0554	3 mo	NA	pedometer, generic paper booklet on how to increase PA mailed, activity log	Yamax Digiwalker SW-200 pedomter	daily step-count	Yamax Digiwalker SW-200 pedomter	step/day change vs. baseline	1505 (–1850 to 4861) vs. 4141 (462 to 8744), p=0.04	NA	computer-tailored step advice (participants had to request the computer-tailored step advice once a month, than they were emailed invitation to access the computer-tailored step advice for a second or third time to receive feedback on their progress. If they did not, a reminder was emailed to reinvite participants to request the computer-tailored step advice for the first time)
DiFrancisco-Donoghue 2018	3	USA	college	adults (18 - 29 y old), medical students, healthy	80	73	39	34	22.9	23.6616	10 mo	NA	received Fitbits only but no emails throughout the study, no gaols given	Fitbit Flex accelerometer	daily step-count	Fitbit Flex accelerometer	steps/day	7429 (2833) vs. 6483 (2359), p=ns	NA	encouraged to participate in mentored weekly walk/runs that were conducted by faculty and administration of the medical school, received weekly emails offering fitness challenges in an attempt to foster an increase in step count (every week for 39 weeks), encouraged to compete in weekly challenges with each other and were given feedback on step count separated by men and women.
Dorough 2014	2	USA	NA	adult (45 to 65 y old), overweight, no major chronic disease and medications	27	23	19	8	54.3	31.5	10 wk	NA	pedometer, Tanita Digital Wight Scale, encouragement to follow a DASH eating plan and to get 30 min of physical activity a day	Accusplit 120XL pedometer	daily step-count	Accusplit 120XL pedometer	step/day change vs. baseline	2,900.14 (1,903.83) vs. 636.39 (1653.26), p<0.01	NA	additionally received an Omron Automatic Blood Pressure Monitor, Wellness Tracker and Dash Diary online, received weekly newlsetters providing feedback & goal-setting as well as continued support through problem-solving
Ellingson 2019	2	USA	campus community	adults (24 to 65 y old), overweight, no diseases	91	91	48	43	41.7	29.6	12 wk	NA	Fitbit Charge, intended to be comparable to a real-world setting wherein individuals purchase and utilize activity trackers on their own	Fitbit Charge accelometer	daily step-count	ActiGraph GT3X+ (ActiGraph, LLC, Fort Walton Beach, FL, USA) and and activPAL3 (Physical Activity Technologies, Glasgow, UK) accelerometers	step/day change vs. baseline	77.50 (2293.78) vs. –297.80 (2658.84), p=0.15	NA	motivational interviewing and habit education provided by a trained health coach, self-selected PA goals and motivation for change during phone calls on 4th and 8th week
Ellis 2019	2	USA	university medical center	adults (18+ y old), with Parkinson disease	51	44	23	28	64.1	NA	12 mo	NA	pedometer, individual walking and exercise program to reach personalized number of steps in a paper format with photos, paper calendars to track to track activity,	Fitbit Zip in an intervention group and Omron Hj-113 Pocket pedometer in the active control group without graphical feedback	daily step-count	StepWatch Activity Monitor (SAM) accelerometer	steps/day change vs. baseline	102.6 steps (95% CI = −888 to 1093) vs. 159 steps (95% CI = −878 to 1195), p=0.94	NA	mHealth app with notifications, repomte adaptation of exercise plans by a physical therapist 2-3 times per month (participants were contacted via a text-messaging feature, however othercontacts were also possible) , adherence and progress toward goals was graphically displayed, videos with exercise prescription
Finkelstein 2016	4	Singapore	general population from 13 diverse industries	adults (21 to 65 y old), insufficiently active based on selfreported physical activity, non-pregnant.	599	491	318	281	35.1698	NA	6 mo	12 mo	activity tracker and website, educational booklet	Fitbit Zip accelometer	MVPA bout min per week, mean daily steps and percentage of participants who met the 70 000 weekly step goal	ActiGraph triaxial GT-3x+ accelerometer (ActiGraph, Pensacola, FL, USA)	steps/day change vs. baseline	[cash] 570 (210 to 930) vs. [charity] –300 (–660 to 70) vs. [Fitbit] –300 (–660 to 70), p=ns	[cash] 30 (–370 to 430) vs. [charity] –70 (–480 to 330) vs. [Fitbit] –30 (–420 to 370), p=ns	tracker plus charitable incentives (charity), and tracker plus cash incentives (cash); two incentive groups could earn weekly incentives: S$15 if they logged between 50 000 and 70 000 steps per week or S$30 if they logged 70 000 or more steps per week
Fitzsimons 2012	2	UK	local area, community stands, local press	Adults (18 to 65 y old), overweight	80	48	63	16	49.2	29.0109	48 wk	NA	individualised 12 week walking programme, 5 minutes of brief advice on goal-setting and self-monitoring and a pedometer (minimal intervention)	Omron HJ-109E Step-O-Meter pedometer	daily step-count	Omron HJ-109E Step-O-Meter pedometer	steps/day change vs. baseline	1876 vs. 1150, p=ns	NA	individual physical activity consultation focusing on relapse prevention strategies, encouragement and maintenance of activity following 12 wk walking programme, at 24 weeks participants received a written physical activity advice leaflet and at 36 weeks remote, support in the form of a short telephone consultation
Frensham 2020	2	Australia	ﬂyers, cancer support groups, newspaper advertisements in region	Adults (29 to 84 y old), overweight	102	91	47	44	65.6451	29.5099	3 mo	6 mo	access to pedeomter only	Yamax Digiwalker SW-700 pedomter	daily step-count	Yamax Digiwalker SW-700 pedomter	steps/day change vs. baseline	2219 vs. 832, p=0.04	1382 vs. 666, p=0.55	pedometer and access to an online resource that included an interactive physical activity diary to facilitate individualized goal setting, self-monitoring/management, and reinforcement for behavior change, weekly step goals emailed
Fukuoka 2019	3	USA	medical clinics, churches, universities, and community centers in San Francisco	physically inactive women (25 to 65 y old), no medical conditions or physical problems that required special attention	210	210	210	0	52.4086	29.8638	3 mo	NA	accelerometer, no physical activity intervention	Omron Active Style Pro HJA-350IT	total daily steps and duration of moderate to vigorous physical activity (MVPA)	The Omron Active Style Pro HJA-350IT triaxial accelerometer	Daily steps changes; intervention vs. control	After 3 months in compare to controls: Steps: + 2060 (p<0.001)	After 9 months: Steps: + 1360 (p<0.001)	brief in-person counseling sessions at randomization, 6 weeks, and 3 months and the mPED app with a daily message or video clip and a daily diary; activity goals, displayed in the weekly goals option,were automatically increased by 20% each week, relative to the participant’s run-in average, until a goal of 10 000 steps per day, 7 days per week, was reached
Gell 2020	2	USA	medical center	adults, overweight, history of stage I–III cancer	70	69	55	15	61.4	30.4	8 wk	NA	general recommendations on the minimal levels of recommended MVPA to achieve health benefits, pedometer	Fitbit One	minutes spent in MVPA	An Actigraph GT3X+ accelerometer	MPVA (min/week) change vs. Baseline	Intervention group: +26.2 (SD 155.6); Control group: -57.5 (SD 127.0), p=0.03.	N/A	self-directed goal setting with a health coach, who also helped in barrier identification, options to overcome barriers, and exercise options for achieving goals, follow-up calls from the coach on weeks 2,4 and 8 of 15-20 min duration for revision and encouragement, 25 text messages over 8 weeks.
Gremaud 2018	2	USA	university	sedentary adults (21 to 65y old)	146	144	110	34	40.45	29.7	10 wk	NA	Fitbit Zip, text message reminders to wear their Fitbit on days following nonwear days	Fitbit Zip	daily step-count and active minutes	The Fitbit Zip activity monitor	steps/day; intervention vs. control group	steps per day: +2092, intervention vs. control (p-value and SD not published?)	N/A	access to a mobile health game and web app, weekly virtual walking races, participants classified into leagues, text message each morning on the progress in the race and a daily activity challenge and bonus steps
H-Jennings 2016	3	Singapore	university	adult students (18 to 19 y old), physically active	300	NA	173	127	NA	NA	8 wk	14 wk	Educational modules on importance of sleep in maintenance of longterm health, impacts of sleep disturbances on the brain and body, and physiological and psychological consequences of chronic stress on healthand, Fitbit Flex	Fitbit Flex	daily step-count	FitBit Flex	steps/day, differences between groups	Weekday: 9470 (SD 7243) vs. 8428 (SD 3876), Weekend: 7586 (SD 6078) vs. 7591 (SD 5070); p-value not published.	Weekday: 7585 (SD 3329) vs. 6051 (SD 2423), Weekend: 6163 (SD 5902) vs. 5696 (SD 6878); p-value not published.	game including selection of daily challenges, a leaderboard to track individual and houses’ progress, and a forum for discussions and references on physical activity and sleep
Harries 2016	3	UK	public spaces in Bristol	adults (22 to 40 y old) relatively healthy, young to early middle-aged men	110	102	NA	NA	NA	NA	6 wk	NA	App and a series of automated e-mails, feedback on the participant’s own steps	bActive app	daily step-count	bActive app	steps/day, differences between groups	No feedback (control): 2822; Personal feedback: 3842; Social feedback: 3984; p-value not published.	N/A	Feedback on the participant’s own steps and on the average steps taken by others in their group
Harris 2017	3	UK	seven general (family) practices in South London	physically inactive adults 45 to 75 y old	685	636	433	252	NA	NA	12 wk	12 mo	simple pedometer, patient handbook and PA diary with BCTs and individual 12-wk walking plan with a goal of adding 3000 steps/d on 5 or more days to a baseline step-count	SW-200 Yamax Digi-Walker	daily step-count	GT3X+, Actigraph LLC, accelerometer	Daily steps (and MVPA) differences betweeng interventions group and control	Daily steps: Postal vs. Control: +692, p<0.001; Nurse vs. Control : +1172, p<0.001. MVPA (min./week): Postal vs. Control: +43, p<0.001; Nurse vs. Control: +61, p<0.001.	Daily steps: Postal vs. Control: +642, p<0.001; Nurse vs. Control : +677, p<0.001. MVPA (min./week): Postal vs. Control: +33, p<0.001; Nurse vs. Control: +35, p<0.001.	three individually tailored practice nurse PA (10- to 20-min) consultations at weeks 1, 5, and 9.
Hemmingsson 2008	2	Sweden	University Hospital	adults, grade III obesity, no contraindication for PA	55	42	33	9	43.4714	41.8619	18 wk	NA	validated pedometer, PA behavior change booklet, five monthly 2-h group meetings including basic instruction to be physically active	SW-701 Yamax Digi-Walker	daily step-count	Yamax Digiwalker, SW-701; Yamax, Tokyo, Japan	Daily steps differences betweeng interventions group and control	Intervention group (AS) vs. Control group (SS) (10,136 vs. 6,118; p=0.024).	N/A	Ten 2-h group meetings in every other week in eddition to standard care, aimed as specifically at walking promotion
Hornbuckle 2012	2	USA	Hospital	inactive middle-aged women (39 to 61 y old)	56	44	44	0	48.9841	35.7659	12 wk	NA	pedometer given, instructed to increase daily pedometer-measured walking to >10,000 steps per da, Each night before retiring, subjects recorded the number of steps on the pedometer for that day, noted the time at which the pedometer was taken off, and briefly reported the specific activities engaged in during that day	SW-200 Yamax Digi-Walker	daily step-count	New Lifestyles Digi-Walker SW-200 pedometer (New Lifestyles, Inc., Lee’s Summit, MO)	steps/day, end of intervention vs. baseline	Group 1 (Walking): 6,845 +/- 2,279 vs. 5,453 +/- 2,119; p<0,05; Group 2 (Walking + resistance training): 6,859 +/- 2,012 vs. 4,823 +/- 1,758; p<0,05.	N/A	supervised progressive RT (resistance training) program 2 days/week, three sets of 8–12 repetitions of 10 resistance exercises for the lower and upper body, and all training sessions were supervised by trained exercise science students
Johnson 2019	3	USA	NA	Adults, sedentary lifestyle (<7,000 steps/day), nondiabetic, ambulatory, <396 pounds in weight	30	30	NA	NA	43.2333	36.1333	12 wk	NA	weight scale, step-tracking accelerometer watch, but no health coaching sessions, or team member feedback on steps per day or calories	Withings Activite Steel step-tracking accelerometer watch (Withings, Inc., Cambridge, MA)	daily step-count	Withings Activite Steel step-tracking acceler_x0002_ometer watch (Withings, Inc., Cambridge, MA).	steps/day, end of intervention vs. baseline	Control group: 5,002 +/- 2,640 vs. 4,324 +/- 2,001; "In-person" group: 6,236 +/- 2,393 vs. 3,641 +/- 1,167 (p>0.05 in compare to CG); "Videoconferencing" group: 7,054 +/- 2,069 +/- 3,755 vs. 1,610 (p<0.05 in compare to CG).	N/A	health coaching educational materials and feedback delivered by the same registered dietitian and exercise physiologist (with goal setting) in accordance with group assignment delivered in-person or via video-conferencing (weekly)
Katz 2018	3	USA	University of California, San Francisco rheumatology clinics	adults with rheumatoid arthritis, no engaging in regular exercise, no stroke, congestive heart failure or chronic obstructive pulmonary disease in past 6 months	68	62	60	8	53.05	33	21 wk	NA	educational booklet and discussion, plus a pedometer and a diary to record daily step counts from the pedometer	FitBit Zip	daily step count, fatigue	The Jawbone Up pedometer (intervention and control group), The Fitbit Zip (onlu intervention groups)	steps/day, end of intervention vs. baseline	Education (control group): 4,609 +/- 3,608 +/- vs. 5,572 +/- 3,768; Pederometer: 5,655 +/- 3,154 vs. 4,223 vs. 2,925; Pederometer + targets: 6,675 +/- 3,706 vs. 5,019 vs. 2,999). Comparsion interventiong group with control (end of the intervention), p<0.01 for both intervention group.	N/A	individualized daily step targets based on the week of activity monitoring between the baseline and randomization visits, and were calculated to increase participants’ average daily step counts by 10% for every 2weeks of the intervention period
Kullgren 2014	4	USA	Philadelphia retirement communities and an AARP member event	Older adults (65+ y old) non myocardial infarction, stroke, or orthopedic surgery; severe cardiac, lung, renal disease	92	92	64	28	71.9	NA	16 wk	24 wk	pedometer, daily walking goals (increasing their daily steps by 50% in 5 days per week for the next 16 weeks), and weekly feedback on goal achievement, provided with links to information about exercise and walking	Fitbit (type not specified)	proportion of days in which daily step goals were met, change in mean daily steps	Fitbit pedometer	Change in mean daily steps during intervention / follow-up (in comparison to control group)	Peer Network group (+833; p=0.51), Financial Incentive group (+1,361; p= 0.84), Combined group (+1,178; p=0.03), Comparison group (+1,247); p-value is calculated regards to Comparison group.	Peer Network group (+279; p=0.18), Financial Incentive group (+559; p= 0.42), Combined group (+309; p=0.27), Comparison group (+1,151); p-value is calculated regards to Comparison group.	entry into a lottery with potential to earn up to $200 each week walking goals were met (Financial Incentive), linkage to 4 other participants through an online message board (Peer Network), or both interventions (Combined)
Liu 2020	2	USA	public libraries, grocery stores and shopping malls	older adults, physically active (i.e., who had 7,000–10,000 daily steps or above everyday	60	56	42	14	65.4	NA	4 wk	NA	mobile application (WeRun) used to track walking steps	mobile aplication to register daily walking steps (WeRun)	mean weekly steps	the WeRun function in WeChat	Change in mean weekly steps (vs. Baseline).	Treatment group: 5,872 +/- 3,494 vs. 4,125 +/- 2,693; Control group: 4,171 +/- 3,122 vs. 3,992 +/- 2,388; p<0.05	Treatment group: 5,911 +/- 3,467 vs. 4,125 +/- 2,693; Control group: 4,330 +/- 3,185 vs. 3,992 +/- 2,388; p<0.05.	social engagement, ineraction via text messages with group members (WeChat app), sharing of number of steps with group members, gamification
Martin 2015	3	USA	ambulatory cardiology center in Baltimore, Maryland	majority of participants were adults (18 - 69 y old), obese, 23% had diabetes, and 29% CHD, individuals reporting <3 days/week of moderate or vigorous leisure-time activity lasting ≥30 min/day	32	32	17	15	56.5	30	2 wk	NA	patients could continuously view their daily step count, activity time, and aerobic activity time through smartphone and Web interfaces; Fitbug app also provided a history tab allowing review of data from previous days	Fitbug Orb (Chicago, IL)	daily step count, activity time, and aerobic activity time	the Fitbug Orb (Chicago, IL)	steps/day change vs. baseline	Unblind: +408 +/- 2,701 vs. Blind (Control) -616 +/- 2,385; p=0.21	Unblind+texts: +2,334 +/- 1,714; Unblind+No Texts: -200 +/- 1,653; Blind (contol): -1,042 +/- 2,202. (Text-control: p<0.001; No-text-control: p=0.23; Text-No text: p<0.001)	smart text messages informed by real-time activity: 3 times/day aimed at individual encouragement and fostering feedback loops by a fully automated, physician-written, theory-based algorithm using realtime activity data and 16 personal factors with a 10 000 steps/day goal
Matz-Costa 2018	2	USA	local senior center, community-based organizations, local businesses	older adults, relatively inactive	30	25	20	5	72.92	NA	8 wk	NA	pedometer, technology-assisted self-monitoring of daily activity via pedometers (to measure PA) and daily tablet-based surveys (to measure cognitive activity, social interaction and physical activity)	Fitbit Zip	daily step-count	FITBIT® Zip pedometer	steps/day change vs. baseline	Intervention group -> baseline: 3,888; 4-week: 4,318; 8-week: 4,164; Control group -> baseline: 5,365; 4-week: 4,906; 8-week: 4,759. Changes differences, intervention vs. Control -> 4-week: p<0.05; 8-week: p<0.05.	N/A	daily tablet-based surveys; psychoeducation + goal-setting via a 3-hour workshop; and peer mentoring via phone 2X/week for 2.5 weeks
Memon 2018	2	Pakistan	university	female undergraduate women (18 to 25 y old), overweight or obese,non-communicable diseases, including diabetes and obesity, being active	56	56	56	0	20.63	NA	5 wk	NA	step-counting application for mobile phones installed	Moves smartphone application (ProtoGeoOy Inc., Helsinki, Finland)	daily step-count	Moves application (ProtoGeoOy Inc., Helsinki, Finland)	Total steps during intervention	Intervention group: 57,800 +/- 48,416; Control group: 47,314 +/- 29,280 (p-value not calculated)	N/A	Intervention group was given a weekly financial incentive based on the following schedule: a) PKR100 (0.95 American dollar [USD]) for logging 7500-9999 steps for >4 days per week; b) PKR200 (1.9 USD) for logging >10000 steps for >4 days per week; and c) PKR300 (2.85 USD) for logging >12000 steps for >4 days per week.
Monroe 2017	2	USA	list servs and word of mouth	Insufficiently active middle-aged adults, overweight or obese, no medical contraindication for engaging in PA	63	63	56	7	48.2	31.1	12 wk	NA	instruction to wear pedometer on a daily basis for 3 months, goal to walk minimum of 3,000 steps/day above their personal, average daily baseline step count on at least 5 days/week and and advised to progress toward it by aiming to accumulate at least 1,000 steps/day and 2,000 steps/day above their average daily baseline step count on at least 5 days during the first week and second week, respect…	Omron HJ-720ITC (Omron Healthcare, Inc., Lake Forest, IL)	daily step-count	Omron HJ-720ITC (Omron Healthcare, Inc., Lake Forest, IL) pedometer	steps/day change vs baseline	1401 vs 2461 steps no significant difference between groups	N/A	Online Social Support group with access to social support tools on the website, placed in groups of 3 to 5 people with discussion boards, encouraged toengage in the discussion board at least three times/week, access to an instant message tool, allowing for real-time communication with their subgroup members via typed text
Morgan 2013	3	Australia	media articles and workplace in Region of New South Wales, Australia	overweight and obese men, no heart disease in the preceding 5 years, no diabetes and orthopedic or joint problems, no medications that might affect body weight	107	107	0	107	47.257	32.5981	3 months	6 months	gender-tailored weight loss materials (DVD, handbooks, pedometer, tape measure for waist circumference and a kilojoule counter book, exercise diary, self-set goals)	Yamax SW-200 pedometer (Yamax Corporation, Kumamoto City, Japan)	daily step-count, waist circumference and kilojoule (by using counter book)	Yamax SW-200 (Yamax Corporation, Kumamoto City, Japan) pedometer	steps/day change vs baseline	2,015 (1,184, 2,846) steps (Online Group) vs 1,838 (1,014, 2,662) steps (Resources Group)	1,575 (753, 2,397) steps (Online Group) vs. 1,586 (796, 2,376) steps (Resources Group)	use the online food and exercise diary on website, record their weight at least once a week and received seven feedback emails about their food and exercise diary entries
Moy 2015	2	USA, Puerto Rico	national database of veterans	Veterans with COPD (67 +-9 y old), sedentary (150 min of self-reported PA per week), medical clearance	238	226	15	223	66.8	NA	4 months	0 (in fact, there is 8 months follow-up, but result are not described in this paper)	Instructed to wear the pedometer every day, upload step-count data at least monthly, and report adverse events, received no instructions about exercise, were not assigned step-count goals, and had access to a webpage that only showed a count of what week they were in the study.	Omron HJ-720 ITC pedometer (Omron Heatlcare, Inc.)	Daily step-count	Omron HJ-720 ITC pedometer (Omron Healthcare, Inc)	steps/day change vs baseline	447 vs -346 steps p=0.005	N/A	uploading step-count data at least once a week, recevied steps goal for every week - lowest of the three: (1) the average of the most recent 7 days of step counts 1 600 steps, (2) the previous goal 1 600 steps, or (3) 10,000 steps per day, acces to motivational website, online community forum
Nakata 2011	3	Japan	Mito Kyodo General Hospital in Japan	adults (45 to 60 y old) overweight, diagnosis of metabolic syndrome according to the Japanese criteria, no drug treatment for diabetes, no coronary disease or stroke, or current or planned pregnancy	125	125	92	33	51.196	29.0992	6 months	NA	Motivational lecture (2h), educational section (2h), educational materials (textbooks, notebooks), pedometer	FB-720 (Tanita, Tokyo, Japan)	Daily step-count, body weight, content of meal	a three-axis accelerometer (HJA-350IT; Omron Healthcare, Kyoto, Japan)	steps/day change vs baseline	1,090 (590 to 1,590) steps (Intensive intervention) and 1,270 (682 to 1859) steps (moderate intervention) vs 1,235 (706 to 1,765) steps (control), no significant difference between groups	N/A	support programme in group of 20-30 people (2 hours/week), 14 hours in total
Patel 2016	4	USA	Health insurance organization (Independence Blue Cross)	sedentary adults (18+ y old), less than 5000 steps per day, healthy	304	304	235	69	40.5224	29.1961	13 wk	13 wk	pedometer, no feedback	Moves smartphone application (ProtoGeo Oy Inc., Helsinki, Finland).	Mean proportion of participant days that the 7000 step goal, daily steps-count	the Moves smartphone application (ProtoGeo Oy Inc., Helsinki, Finland).	steps/day; daily steps differences between groups	5280 vs. 3929, adjusted difference: 1446, 95 % CI: 448–2444, p = 0.005 (the combined incentive vs control); 4516 vs. 3929, adjusted difference: 602, 95 % CI: -393–1596, p= 0.24 (the individual incentive vs control) ; 3930 vs. 3929, adjusted difference: 193, 95 % CI: -819–1205, p = 0.71 (the team incentive vs control)	adjusted differences: 1077, 95 % CI: 7-2146, p = 0.049 (the combined incentive vs control); 405 95% CI: -668 - 1479, p= 0.46 (the individual incentive vs control); 10 95 % CI: -1063-1084, p= 0.98 (the team incentive vs control)	An individual incentive arm, a team incentive arm, and an arm that combined individual and team incentives; feedback whether the goal of at least 7000 steps was achieved on the prior day for 26 wk; In the individual incentive arm, each participant on a winning team was eligible to collect $50, but only if he or she had at least 7000 steps on the prior day. In the teamincentive arm, each participa…
Patel 2017	2	USA	Framingham Heart Study	Adults	206	200	112	88	55.955	27.047	12 weeks	24 weeks	Before interwention was conducted 2 weeks run-in period, were for every participant was established the average step count level (baseline). Each participant select a goal step increase of 33%, 40%, 50% or any goal at least 1000 steps greater than baseline. All participants selected wheter to recive study communication by text message, email, or both. Participants download a smartphone aplication…	Smartphone application (Moves; ProtoGeo Oy or Fitbit, Inc), wrist-worn device (Fitbit Flex, Fitbit, Inc)	Daily step-count	a smartphone application(Moves; ProtoGeo Oy or Fitbit; Fitbit, Inc) wrist-worn wearable device (Fitbit Flex; Fitbit, Inc)	steps/day change vs baseline	1661 steps vs 636 steps ; adjusted for baseline difference: 953; 95%CI, 505-1401; P < .001, adjuested for baseline and device difference: 1004; 95% CI, 545-1463 p<.001	1385 vs 798; adjusted for baseline difference, 494; 95% CI, 170-818; P < .01; adjusted for baseline and device difference, 523, 95% CI 184-862, p=.003	Participants in intervention group were entered into a game. They participate in the game with family member. Each day, the family was informed of one member who was selected at random to represent their team. If he or she had reached step goal for current day, they could keep 10 points, otherwise they were losing it. If the family had 50 points or more at the end of the week, they advanced up a …
Pears 2016	4	UK	UK National Health Service primary care practices in urban and rural areas in the East of England	adults (40–74 y old) not previously diagnosed with heart disease, stroke, diabetes, or kidney disease	154	89	123	31	52.261	NA	4 weeks	NA	Participants received the usual health check meeting which aims to help prevent cardiovascular disease, the goal steps recommendation (10 000 steps), pedometer, booklet with educational materials: information on physical activity and step recommendations, instructions on how to use the pedometer to monitor daily steps; and tips for increasing the number of steps.	Yamax SW200 Digi-Walker	Daily step-count	tri-axial accelerometry (ActiGraph GT3X+,ActiGraph, Pensacola, Florida, USA)	steps/day	8162 (7464, 8859) steps vs. 7844 (6921, 8766) steps	N/A	Additional educational service about the benefits of physical activity; diary with setted goals, action plan and self-monitor physical activity; booklet with educational materials; tips for inceasing physical activity; information about local physical activity resources.
Petry 2013	2	USA	University Health Center	sedentary older adults, walking >1,000 but <6,000 steps per day, with mild to moderate hypertension	45	45	38	7	63.2	NA	12 wk	24 wk	Wear pedometer every day, meet weekly with staff, encouraged to reach steps ≥6,000 steps per day in week 1, ≥8,000 steps per day in week 2, and ≥10,000 steps per day for the remainder of the 12-week treatment period and educated about health benefits of walking. At weekly meeting, which lasted 10–15 minutes, pedometer data were recorded, and participants were congratulated for every day they walk…	Omron HJ-112 (Kyoto, Japan)	Daily step-count	Omron HJ-112 pedometer (Kyoto, Japan)	steps/day	N/A	7,503 (+- 1,073) steps vs. 5,004 (+- 1,360) steps	Participants were incentivized by lottery with gifts for each day they reached the goal steps ((≥6,000 in week 1, ≥8,000, in week 2, and ≥10,000 in weeks 3–12). At each visit, they earned one draw from a prize bowl for each day they walked the target number of steps. They also earned bonus draws each week that they met the goal on at least 6 days. Bonus draws started at 3 and increased by 3 at ea…
Plotnikoff 2013	2	Canada	hospitals and community clinics	insufficiently active adults with type 2 diabetes mellitus	287	133	88	105	61.8477	30.1518	12 months	18 months	Educational materials about physical activity, pedometer, logbook and calendar to chart their progress (no steps goal but activity goal 150 min/week)	Not specified	PA (self-reported) minutes per week; 3-day step count.	pedometer, not specified	steps/3-day	21,493 (884) steps vs 20,821 (925)	N/A	Telephone counseling (first month: weekly, next month: biweekly, other: montly)
Polgreen 2018	3	USA	University of Iowa students, faculty, staff and retirees and a newsletter distributed in all hospital cafeterias	diabetes or pre-diabete adults (19 to 75 y old), obese	138	101	105	33	44.9594	37.3522	6 mo	NA	Fitbit, access to Fitbit app, 40-page brochure about healthy weight loss, 3 in-person visits,	Fitbit Zip	daily step-count	Fitbit Zip accelerometer	steps/day	6906 (SD 3748) steps (the goal-setting) and 6854 (SD 3949) steps (the reminders group) vs. 7123 (SD 4287) steps (the Fitbit-only group)	N/A	The goal-setting group was sent text-message reminders to wear their Fitbit and daily text messages asking for a step goal.
Prestwich 2017	3	UK	local media sources and direct approaches	Physically inactive adults (18 - 65 y old)	281	263	213	68	23.0258	NA	4 wk	NA	Pedometer, a goal of at least 10 000 step per day, study website to log every 7 days to answer a question regarding how much activity they did while notwearing their pedometer	Yamax CW-300	daily step-count	Yamax CW-300 pedometers	steps/day	6420 (SD 2587) steps vs. 6169 (SD 2534) steps p=0.15 (non-adjusted steps); 7005 (SD 2783) steps vs. 6683 (SD 3412) steps, p=0.04 (adjusted for non-wear )	N/A	(Self-monitoring group) asked to log onto the study website at least once every 7 days to record their number of pedometer steps, also able to track changes in their pedometer steps over the course of the study via graphical and tabular feedback; (Competition) received feedback relating to how their pedometer steps compared to other participants in their condition
Raedeke 2017	2	USA	university	physically active adults, overweight	62	26	NA	NA	44.48	29.46	10 weeks	30 weeks	Participants in both group met once a week with their respective group for an approximately 30-min walk. All participants were given a pedometer. Participants were also informed of both the 10,000-step guideline and public health PA recommendations.	Omron Pedometer (Model HJ-112)	Daily step count, PA self-efficacy, and barrier efficacy	Omron Pedometer (Model HJ-112)	steps/day	8,175 (SD 3,513) steps vs. 6,167 (SD 1,791) steps, p=0.002 (baseline is 5892 vs. 6088)	7,932 (SD 2,894) steps vs. 6,903 (SD 1,941) steps (follow-up after 20 weeks)	Participants in this condition receive feedback from the research staff about their PA goals and step counts. They meet after weekly walk for 30 minutes to discuss self-regulatory strategies and they were encouraged to share successes/ challenges with their group.
Richardson 2010	2	USA	university	sedentary, ambulatory adults (24 to 82 y old), overweight, type 2 diabetes or coronary artery disease	324	247	211	113	52	33.2	16 weeks	NA	Participants were enrolled in an Internet-mediated walking program. Participants had access to personalized intervention webpage.	Omron HJ-720-ITC	Daily step count	Omron HJ-720-ITC pedometer that contains a dual-axial accelerometer, an embedded USB port	steps/day change vs baseline	1974 (SD 2464) steps vs. 1579 (SD 2137) steps, p= .20	NA	Participants allocated to Intervention could read or post messages to other participants.
Richardson 2016	3	USA	Veterans Administration Medical centers	male adults with or a trisk for CVD, US veterans, at least one of following conditions: diabetes, hypertension, obesity, CAD, hypercholesterolemia, perform less than 30 min of moderate intensity of PA ≥5 d*week	170	121	0	170	56.9624	NA	6 month	NA	Participants received five sessions of dietitian-delivered, one-on-one nutritional counseling for weight loss. They received also simple pedometer with manual step count logging and step count walking goals. Participants reviewed their step count logs with the dietitians, this information was used to collaboratively set a new step count goal. Participants were encouraged to increase their daily w…	Digiwalker SW 200 (simple pedometer); SportBrain iStep X (enhanced pedometer)	Daily step count, accelerometer-measured physical activity (time), weight loss (kg)	Actical® accelerometers (Mini Mitter Co.)	steps/day	NA	NA	Participants recived an uploading pedometer with internet mediated step count feedback and goals. They get motivational messages and feedback on the SportBrain.com website. Participants were encouraged to engage in an online community where they could read and post messages about their walking program.
Robinson 2019	2	USA	flyers, community events, and online advertisements in the greater Boston-area.	inactive, healthy adults (35 to 69 y old)	62	25	45	17	49.37	NA	4 weeks	11 weeks	daily emails asking participansts to record their steps and answer a few questions about their experiences that day.	Pedometr: Fitbit Zip wireless activity tracker	(1) daily step-count and; (2) time spent in moderate-to-vigorous physical activity (MVPA)	Fitbit Zip wireless activity tracker	steps/day change vs baseline	1934,29 steps vs. -228,31 steps	NA	regular mailing every evening for 4 weeks with the implementation intention intervention strategies (daily schedule planning instructions, goals to increase their steps, or maps); a goal to increase the number of daily steps each week, increments of 2,000.
Rowley 2019	3	USA	community via mass media announcements, mailed invitations, and recruitment postings, Arizona	inactive older adults (55 to 80 y old), achieving less than 7,500 steps per day, no orthopedic limitations	119	84	95	24	67.8689	29.9336	12 weeks	NA	the goal to increase their daily step count by 10% each week until they met 10,000 steps per day after which they were instructed to maintain 10,000 steps per day; participanst received a free pedometer and a US$50 honorarium	Omron HJ-720ITC pedometer	daily step-count	Omron model HJ-112 (Kyoto, Japa) pedometer	Steps/day change vs. baseline	10.286 (SD 3022) vs 4688(SD 1485) steps; increase 119,0% in steps count ( p< 0.001)	N/A	tailored feedback via an online platform weekly that included: discussion forum and access to “ask the expert” each week, and 1) during weeks 1 to 3: providing cognitive understanding of the benefits of PA, education on national recommendations, and self-awareness of current activity levels: the comparison of graphically represented uploaded steps per day with nationally recommended amounts. 2) d…
Serper 2020	3	USA	Hospital of the University of Pennsylvania	post transplant physically inactive adults with kidney transplant recipients or liver transplant	85	67	31	54	53.4824	26.5529	12 weeks	18 weeks	standard instructions regarding healthy diet and physical activity that are provided after transplant+accelorometer +access to an online portal with health information including answers to health engagement questions as well as links with educational online resources regarding healthy diet and physical activity.	wearable accelerometer (iOS or Android),	daily step-count	any precise information	steps/day change vs. Baseline	8532(SD 3907) vs 7691( SD2978) , p=0,19	N/A	Individualized goals was an increasing by 15% daily steps count every 2-weeks (in relation to the mean steps during the 2-week run-in period) at a maximum goal 7000 steps. Financial incentives: a loss of $3 for each day that a participant failed to meet their step goal and $3 for incorrectly answer or lack of answer two true/false transplant-specific health engagement questions (they received pap…
Shin 2017	3	South Korea	students from Seoul National University	adults (20 to 39 y old) male students, with overweight or obesity	70	66	0	66	27.8	29.8	12 weeks	NA	standardized education materials+ a one-to-one education on diet and exercise from a trained nurse for 5 minutes each session (clinical consequence of obesity; a dietary recommendation for weight loss) + The goal is weight loss by 3%, 5%, and 7% of baseline at weeks 4, 8, and 12, respectively and the level of PA calculated as higher activity level than that required for general health maintenance…	Fitmeter accelerometer (Fit.LifeTM, Suwon, Korea) and smartphone application	kcal/d	Fitmeter accelerometer (Fit.Life, Suwon,Korea ) and smartphone aplication	level of physical activity; achievement of physical activity goals	level of physical activity in intervention group without incentives not significantly different as compared with controls	N/A	financial incentives (achievement of daily physical activity goals: 1 KRW per day and an additional 3 KRW for a full week [7 days] of meeting goals; weight target: 50 KRW for achievement of the weight loss targets of 3% and 5% of baseline body weight at weeks 4 and 8, respectively, and 100 KRW for the achievement of the final target of 7% at week 12)
Suboc 2014	3	USA	Medical College of Wisconsin (Milwaukee, WI)	sedentary older adults (≥50 and ≤80 y old), no uncontrolled hypertension (≥160/100), recent myocardial infarction (within 1 month of enrollment), angina, clinical evidence of heart failure or documented left ventricular ejection fraction of ≤45%, renal insufﬁciency, liver dysfunction, active malignancy, or cognitive impairment	72	66	26	40	63.5455	29.2091	12 weeks	NA	The pedometer, pedometer logs with 12 self-addressed, stamped envelopes in which to return a 7-day log each week to the study investigators; the goal to increase their PA by 10% each week above baseline levels in order to reach an average of 10 000 steps/day,	(Omron HJ-720ITC; Omron), an accelerometer (ActiGraph GTX3; ActiGraph)	daily step-count	Pedometer OMRON HJ-72)ITC, Accelerometer ActiGraphGTX3	average steps count/day; average minutes of physical activity ( light, moderater, vigorous)	9596 (SD 3907) vs 5136 (SD 1554) steps , p<0.001 as compared with controls	N/A	the instruction to log at least every week onto an interactive website that employed key strategies to increase the adoption and retention of lifestyle-integrated habitual physical activity in older adults (frequent feedback, self-regulation of activity education and practice in realistic behavioral change strategies and goal, setting and rewarding):every week: comparison graphical representation…
Vallance 2007	4	Canada	The Alberta Cancer Registry residing in Northern Alberta, Canada	adults (34 to 86 y old), breast cancer survivors, with physician approval	187	172	NA	NA	58	27.3	12 weeks	NA	a personalized physical activity report containing baseline information on objectively measured daily PAL, recommendations, information on the EE of familiar activities (orally presented at all participants); a standard recommendation to perform 30 minutes of moderate/vigorous PA on 5 days of the week and an encouragement to increase their PA minutes per day and/or days per week plus pedometer (w…	Digi-Walker SW-200 pedometer (New Lifestyles Inc, Lee’s Summit, MO)	daily step counts	DigiWalker SW Pedometer	steps/day change vs. Baseline	8420 (SD5226) vs 8476 (SD 3248) any siginicant change vs baseline and vs control gropu in number of steps, but significant increase in self-reported MVPA and self reported brisk walking in intervention group/s	N/A	copy of Exercise for Health: An Exercise Guide for Breast Cancer Survivors
Van Hoye 2018	4	Belgium	local pharmacies and doctor practices	Adults (19–67 y old), physical Activity Level lower than 1,71 METs	171	161	34	137	42.7635	27.3701	4 wk	12 mo	(PG) - feedback on daily steps only, (DG) feedback on daily steps, on daily moderate-to-vigorous physical activity [MVPA] and on total energy expenditure [EE]), education in both groups on how much activity is needed to reach activity goals	Yamax SW Digiwalker	Daily physical activity level (PAL; Metabolic Equivalent of Task [MET]), number of daily steps, daily minutes of moderate to vigorous physical activity (MVPA), active daily EE (EE > 3 METs)	Yamax SW200 pedometer	steps/day change vs. Baseline ; Daily physical activity level ( minutes of MVPA, total daily EE)	number of daily steps increased by 13,1 % from 8840 ( SD 101) at base line in PG intervention Group ; daily MVPA increased in min by 21,1 % from 101 (SD 45 min)	significant changes still evident after 1 yr.	CoachG had one face-to-face meeting of 30 min with a personal coach each week
Vetrovsky 2018	2	Czechia	four general practices	physically inactive adults	23	23	11	12	41.1739	33	12 wk	NA	instructed to wear the pedometer and gradually increase the daily number of steps up to 10,000	eVito 3D Step Counter SL (HMM Diagnostics GmbH, Dossenheim, Germany)	daily step-count	eVito 3D Step Counter SL pedometer	steps/day change vs baseline	6719 (SD 2859) vs 5043 (SD 1377) p< 0,0004	NA	regular email counseling (8 emails in total) using BCTs (self-monitoring, action planning, goal setting, and personalized feedback)
Wan 2017	2	USA	pulmonary clinics	U.S. Veterans with chronic obstructive pulmonary disease	114	109	14	95	68.6	29.3	13 weeks	NA	a pedometer and written materials about exercise at study entry, participants were instructed to wear the pedometer daily while awake and to upload step counts at least monthly via the website (that had no content except a display of the study week)	Omron HJ-720 ITC pedometer	daily step counts	Omron model HJ-112 (Kyoto, Japa) pedometer	steps/day chnge vs baseline	number of steps in intervention group remained significant higher by 864 steps in pedometer-website group at week 13 ( 3769 ,SD 2386 at baseline)	NA	instructed to wear the pedometer daily during all waking hours, to upload step counts weekly; an acces to a website which provided the four key components of individualized goal-setting, iterative step-count feedback for self-monitoring, educational and motivational content to enhance disease self-management and self-efficacy, plus an online community forum for social support; step-count goals re…
Wang 2015	2	USA	University	Adults (19 to 66 y old), overweight and obese	67	67	61	6	48.2	NA	6 weeks	NA	self-monitoring with Fitbit One only: wearing the Fitbit One tracker and upload data every day for the duration of the study; before randomization a brief 5-min intervention to review motivation, set goals (i.e., toward 10,000 steps/day), and plan for challenging situations; print materials from the U.S. Department of Health and Human Services	the Fitbit One (wearable tracker plus aWeb site/mobile application (app))	daily step count and minutes of PA	FitBit One accelerometer ; Actigraph GT3X accelerometer	steps/day, MVPA, total PA	6909 (SD 415() vs 6885 (SD 638) NS change p=0,20	N/A	three daily SMS-based PA prompts every 2 weeks throughout the 6-week study period.
Watson 2012	2	USA	health care facilities, hospital	adults (20 - 55 y old) , overweight and obese	70	57	59	11	42.4	30.3	12 weeks	NA	an access to the pedometer manufacturer’s password-protected ActiHealth website to view graphs of their activity levels over time and set personal goals.	ActiPed;FitLinxx, Norwalk, CT, USA	step count	Pedometer ActiPed, FitLinx, Norwalk,CT,USA)	steps/day change vs baseline , steps count vs controls	7024 vs 6943 steps/day p=0,85	N/A	access to the virtual coach, an automated, animated computer agent that ran on the home computers, set goals, and provided personalized feedback; participants were instructed to meet with the coach three times a week, approximately 5 to 10 minutes per session. Participants were provided with gift cards for attendance at each study visit.
Winett 2007	3	USA	Church members in the south Atlantic region	sedentary adults (pretest step counts < 7,500 per day) with a median age of 53 years	728	644	488	240	51.515	28.825	12 weeks	9 months	The Guide to Health (GTH) Internet-delivered program focused on the nutrition and physical activity, 12 GTH modules - each module successively accessible on a weekly basis, Prior to the first module, baseline step counts were entered into the program, and participants completed an online assessment about their nutrition and their preferred reasons for using GTH (e.g., health, weight management) t…	Accusplit AE120,San Jose, CA	daily step account	Pedometer Accusplit AE120, San Jose, CA	steps/day change vs baseline	significant increase in daily number of steps ( ca 1500 steps/day ) in intervention group (GTH Plus vs controls , p = 0,05 ; about 7000 steps/day at baseline in all compared groups	still increased number of steps at follow-up ( 16 months after pre-test ) about 1000 steps/day , p = 0,01	a series of church-based supports based on behavioral strategies that amplified the content of GTH: prompts and reminders from the pulpit and in church, info about reaching the goal printed on posters displayed at the church and in the churches’ bulletins and newsletters, award badges to participants who routinely met step and nutrition goals, posted low-fat recipes etc
Barclay 2018	2	Canada	local newspaper, seniors’ centers, an organization supporting those recovering from stroke, and posters in seniors’ apartments.	adults aged ≥ 65 years	9	9	7	2	75.5	NA	3 months	6 months	1 day workshop tivity stations aimed to build knowledge and skills to safely walk outdoors	Pedometer, not specified	daily step-count	ActiGraph GT3X+ accelerometer and a global positioning system (GPS) monitor (Qstarz BT-Q1000XT A-GPS Travel Recorder	daily step-count	descriptive individual data	descriptive individual data	9-week group-based outdoor walking program consisted of repetitive practice of mobility tasks at local park
Kitagawa 2020	3	Japan	public relations magazine	healthy women, aged ≥20 and <50 years, housewife	32	32	32	0	37.2	21.6	2 weeks	NA	pamphlet, describing the risks of prolonged sitting, feedback on sitting time by a smartphone application	UP24 by Jawbone, San Francisco, CA, USA accelerometer	daily step-count	UP24 by Jawbone, San Francisco, CA, USA accelerometer	daily step-count	decrease of 38 vs. 660 step/day, p=0.13	NA	individual suggestions regarding lifestyle to shorten sitting time.
Patel 2018	4	USA	University employees	obese adults (aged 18 years or older, had a body mass index (BMI) of 27 or greater)	109	109	84	25	41.5	33.3	13 weeks	26 weeks	a goal of 7000 steps per day, daily feedback on performance	Moves smartphone application (ProtoGeo Oy)	daily step-count	Moves application (ProtoGeoOy)	steps/day change vs baseline between study groups	784 (_x0003_673 to 1681), p=0.09	237 (_x0003_629 to 1104), p=0.59	"combined lottery" incentive arm, each participant had both an 18% chance (approximately 1 in 5 chance) of winning $5 and a 1% chance of winning $50, designed similar to prior work each day. Their were eligible to collect their winnings only if they had achieved at least 7000 steps on the prior day. Participants who won the lottery but did not achieve their goal were informed what they would have…
Patel 2016b	4	USA	employees or family members of employees from the University of Pennsylvania	healthy adults (18 years of age or older)	180	180	145	35	40.8	28.25	13 weeks	26 weeks	a goal of 7000 steps per day, weekly feedback on performance, each team was told how their weekly average step count compared to the 50th percentile in this arm	Moves application (ProtoGeoOy)	daily step-count	Moves application (ProtoGeoOy)	steps/day change vs baseline between study groups	683 (3211 to 1577), p=0.13	531 (3296 to 1358), p=0.21	incentive arm, each participant had both an 18% chance (approximately 1 in 5 chance) of winning $5 and a 1% chance of winning $350, designed similar to prior work each day. Their were eligible to collect their winnings only if they had achieved at least 7000 steps on the prior day. Participants who won the lottery but did not achieve their goal were informed what they would have won had they been…
Agarwal 2021	3	USA	Corporal Michael J. Crescenz VA Medical Center	US veterans classified as having overweight and obesity, (18 years of age or older)	120	118	42	72	58	32.7	12 weeks	20 weeks	a wearable device to track step counts and selected a step goal, feedback from their devices	Fitbit Alta or Inspire accelerometer	daily step-count	Fitbit Alta or Inspire accelerometer	steps/day change vs baseline between study groups	1224 steps; 95%CI, 451 to 1996 steps; p=0 .005	564 steps; 95%CI, −261 to 1389 steps; p=0.37	game with points and levels designed using behavioral economic principles and selected a support partner to receive weekly updates, $120 allocated to a virtual account and lost $10 if weekly goals were not achieved.
Anand 2021	2	USA	2 high-volume nephrology clinics	adults with advanced chronic kidney disease	56	56	31	25	57.2	NA	8 weeks	16 weeks	wearable activity trackers and fitness professional counseling	Garmin Vivofit 3 activity tracker	daily step-count	Garmin Vivofit 3 activity tracker	steps/day change vs baseline	−217.6 [610.4] vs −730.9 [568.1] steps per day, p 0.25	−1,217.1 [624.4] vs −946.1 [576.9] steps per day; p=0.84	twice-weekly 1 hour small-group directed exercise sessions customized to persons with kidney disease
Chow 2021	2	USA	Fred Hutchinson Cancer Research Center	Adults age 18 to 55 years, receipt of HCT or any history of acute leukemia or lymphoma	41	37	20	21	45.1	29	16 weeks	NA	access to activity trackers	Fitbit Flex wearable wristb and and mHealth app	daily step-count	ActiGraph GT3X, ActiGraph LLC, Pensacola, Florida) accelerometer	steps/day change vs baseline	711 (− 251, 1673) vs. 260 (− 779, 1299), p=0.53	NA	individualized goal-setting (daily steps, sodium, saturated fat, added sugar intake) per feedback from mHealth trackers (Fitbit for activity; Healthwatch360 for diet), supplemented by a Facebook peer support group.
Compton 2021	2	USA	Corporal Michael J. Crescenz VA Medical Center	US adults veterans with chronic pain	40	39	3	37	57	NA	12 weeks	NA	activity trackers and daily text message reminders to increase physical activity	Fitbit activity tracker	daily step-count	Fitbit activity tracker	steps/day change vs baseline	439 vs. -1594, p=0.49	NA	weekly regret lottery, those in the intervention arm, participants who met their activity goal, had a chance to win a small ($30) or large ($100) gift card incentive; those who did not meet their goals were informed of what they would have won had they met their goal.
Ellingson 2022	3	USA	campus community using electronic mailing lists	adults (24–65 yr of age with low back pain	42	36	20	22	44.1	30	12 weeks	NA	wearable activity monitor	Fitbit Charge accelometer	daily step-count	ActiGraph GT3X+ (ActiGraph, LLC, Fort Walton Beach, FL, USA) and activPAL3 (Physical Activity Technologies, Glasgow, UK) accelerometers	average number of steps accros the interevention	9990 ± 4500 vs. 9212 ± 3137; p=0.2	NA	one primary session of health coaching and two check-ins based on motivational interviewing
Francis 2021	2	USA	Internal Medicine clinic	Obese adults with elevated risk for T2D (either BMI ≥30 kg/ m2 or a BMI ≥25 kg/m2 plus a hemoglobin A1C value between 5.7 and 6.4%).	388	388	299	89	46.4	36.7	6 months	NA	activity tracker alone	Fitbit Zip accelerometer	daily step-count	Fitbit Zip accelerometer	steps/day change vs baseline	1697 (95% credible interval: 996 – 2403)	NA	6 months of weekly virtual races, each week, participants were placed in a race with 9 others who achieved a similar number of steps in the previous week’s race. Participants moved along the virtual route by the steps recorded on their Fitbit and received daily walking challenges via text message. Text messages also had links to the race map and leaderboard.
Keadle 2021	2	UK	recruited via fliers distributed on social media and emailed to cancer support groups	young adults cancer survivor, ≥ 18–< 50 years	51	45	44	7	36.8	28.7	12 weeks	NA	Fitbit, step goal, electronic weekly newsletter	Fitbit One	daily step-count	ActivPAL accelerometer	steps/day change vs baseline	1688 vs 516 steps/day, a difference of 1173 (95% CI 541–1804) steps/day, p < 0.001)	NA	charity donation if step goal achieved
Khunti 2021	3	UK	through family practice, sup- plemented by recruitment from research databases	multi-ethnic adults at high risk of diabetes	906	620	447	459	59.3	28.3	48 months	NA	a structured group education session followed by annual group-based support;	Yamax SW200 pedometer	daily step-count	Actigraph GT3X+ accelerometer	steps/day change vs baseline	(−317 [2969] vs. -312.5 [2499]), p=ns	NA	mHealth intervention delivering tailored text messages supported by telephone calls
Larsen 2021	2	Denmark	community-dwelling older adults	healthy older adults (very old above 75)	70	62	42	28	72	27.2	12 weeks	NA	physical activity monitor for everyday use in the intervention period and a pamphlet with the national recommendations on PA in aging populations	Garmin Vivofit 3 tri-axial accelerometer	daily step-count	Garmin Vivofit 3 tri-axial accelerometer	average daily step count	6492 (5472; 7513) vs. 5837 (4932; 6742), p=0.07	NA	motivational interviewing - seven telephone calls from trained and certified counsellors in intervention week 1, 2, 3, 5, 7, 9 and 12
Mamede2021	2	Netherlands	recruited via email and social media and through their department team leaders	Healthy adults	234	234	146	88	46.7	26.3	10 weeks	14 weeks	basic digital app with self-monitoring and goal setting	Fitbit Flex accelerometer	daily step-count	Fitbit Flex accelerometer	average daily step count difference between groups	−222.3 (416.4), p=0.59	−1520.2 (441.2), p<.001	5-week gamification phase encompassing a gamified digital app with social support features and a 5-week physical nudges phase
Oppezzo 2021	2	USA	Women's Heart Health Clinic or Cardiovascular Clinics at Stanford	sedentary women from a heart clinic	45	37	45	0	60.6	29	13 weeks	35 weeks	Fitbit only, 13 weeks of tailored weekly step goals	Fitbit Inspire accelerometer	daily step-count	Fitbit Inspire accelerometer	steps/day change vs baseline	820 vs. -571, p=0.028	589 vs. -111, p=0.081	a private Twitter support group, with daily automated behavior change “tweets” informed by behavior change theory, and encouragement to communicate within the group.
Pinto 2021a	2	USA	Prisma Health Upstate (Greenville, SC)	Older cancer survivors ( ≥65years)	20	19	1	19	71.6	NA	12 weeks	NA	tailored step goal program over the intervention; weekly step increases were based on a percent increase from baseline.	Fitbit Charge 2 accelerometer	daily step-count	Actigraph accelerometer (GT3x)	steps/day change vs baseline	1488 vs. -1209, p=0.018	NA	audiobook group were encouraged to listen to audiobooks (downloaded onto a smartphone device via an app available at no cost from the local library) during physical activity
Rossen 2021	3	Sweden	primary care settings	older adults, in prediabetes and type 2 diabetes	123	106	56	67	64.7	29.9	24 wekks	NA	self-monitoring of steps	Yamax Digiwalker SW 200	daily step-count	ActiGraph GT1M accelerometer	steps/day change vs baseline between study groups	191 steps, p=ns	NA	12 group consultations led by project staff (the urban centres) and a diabetes specialist nurse (rural center) (10 during the first year) and nine individual face-to-face consultations (seven during the first year) by their diabetes specialist nurse.
Hajna 2021	4	UK	staff and students on the Cambridge Biomedical Campus	Healthy inactive adults, aged <18 or >65 years	243	206	102	141	42.3	26.8	12 weeks	NA	activity tracker	accelerometer Imperative Health	daily step-count	accelerometer Imperative Health	steps/day change vs baseline between study groups	not reported	NA	virtual coaching, a user-driven online platform and provided the Activity Band PLUS group a more interactive experience than that provided to the Diary and Activity Band groups. It used the activity data from the activity trackers and the weight data from the Bluetooth-enabled scales to provide numerical and graphical feedback to participants regarding their progress.
Guagliano 2020	3	UK	Used electronic media (e.g., social media, television news)	Healthy adults	45	45	23	22	40.85	26.6	58 weeks	NA	pedometer only	pedometer type not specified	MVPA	Acti-Graph GT3X+ tri-axial accelerometer and GPS	change in MVPA between groups	1.2 (−11.7,14.2)	NA	access to the FRESH website, allowing participants to select step challenges to ‘travel’ to target cities around the world, log their steps, and track progress as families virtually globetrot
Pinto 2021b	3	USA	recruited via informational mailings, tumor registries, community events, hospitals/ clinics	Women aged 21 years of age and older (diagnosed with Stages 0–3 breast cancer within the past 5 years)	161	126	161	0	57.3	NA	6 months	9 months	self-monitored PA and feedback reports	Digiwalker	MVPA	Actigraph accelerometer	change in MVPA between groups	Reach Plus Message out-performed Reach Plus (b = 31.50, SE = 6.89, f2 = .18, p = .03) and a borderline effect favoring Reach Plus Phone over Reach Plus (b = 15.10, SE = 4.55, f2 = .09, p = .06).	ns	a monthly phone call (Reach Plus Phone) or weekly text message (Reach Plus Message)
